# Supplementary material
Source: MDPI journal article supplement (https://www.mdpi.com/2304-8158/10/7/1669)
Supplement: s1 [file s1]

Archive with 1 entries (1 files):
- foods-1255795 supplementary materials - corrected.pdf
