# Supplementary material for: Effect of Barrel-to-Barrel Variation on Color and Phenolic Composition of a Red Wine
Source: MDPI journal article supplement (doi:10.3390/foods10071669), 2021-07-20
Supplement: s1 [file s1 › foods-1255795 supplementary materials - corrected.pdf]

Table S1: Average required barrel number per lot for different levels of precision.

| Analytical Parameter                               | Barrel number required for results within the called percentage of the true population mean |     |     |     |     |
|----------------------------------------------------|---------------------------------------------------------------------------------------------|-----|-----|-----|-----|
|                                                    | 2%                                                                                          | 5%  | 10% | 15% | 20% |
| Density (g/mL)                                     | 1                                                                                           | 1   | 1   | 1   | 1   |
| pH                                                 | 1                                                                                           | 1   | 1   | 1   | 1   |
| Alcoholic Strength (% vol.)                        | 1                                                                                           | 1   | 1   | 1   | 1   |
| Total Dry Matter (g/L)                             | 1                                                                                           | 1   | 1   | 1   | 1   |
| Sulfates (mg/L)                                    | 3                                                                                           | 1   | 1   | 1   | 1   |
| Total SO <sub>2</sub> (mg/L)                       | 3                                                                                           | 1   | 1   | 1   | 1   |
| Total Acidity (g tartaric acid/L)                  | 5                                                                                           | 1   | 1   | 1   | 1   |
| Ash (g/L)                                          | 5                                                                                           | 1   | 1   | 1   | 1   |
| Chloride (mg/L)                                    | 5                                                                                           | 1   | 1   | 1   | 1   |
| L*, Clarity (a.u.) [0=black, 100=colourless]       | 7                                                                                           | 1   | 1   | 1   | 1   |
| Tonality                                           | 7                                                                                           | 2   | 1   | 1   | 1   |
| Colour due to Copigmentation (%)                   | 12                                                                                          | 2   | 1   | 1   | 1   |
| a*, Green-Red (a.u.) [green < 0 > red]             | 15                                                                                          | 3   | 1   | 1   | 1   |
| C*, Chroma (a.u.)                                  | 17                                                                                          | 3   | 1   | 1   | 1   |
| Colour Intensity (a.u.)                            | 19                                                                                          | 3   | 1   | 1   | 1   |
| Total Phenols (mg/L gallic acid)                   | 19                                                                                          | 4   | 1   | 1   | 1   |
| Flavonoids (mg/L gallic acid)                      | 22                                                                                          | 4   | 1   | 1   | 1   |
| Tanning Power (NTU/mL)                             | 35                                                                                          | 6   | 2   | 1   | 1   |
| Non-flavonoids (mg/L gallic acid)                  | 61                                                                                          | 10  | 3   | 2   | 1   |
| Polymerised Pigments (a.u.)                        | 88                                                                                          | 14  | 4   | 2   | 1   |
| Volatile Acidity (g acetic acid/L)                 | 92                                                                                          | 15  | 4   | 2   | 1   |
| Polymerisation Index (%)                           | 145                                                                                         | 24  | 6   | 3   | 2   |
| Residual Sugar (g/L)                               | 150                                                                                         | 24  | 6   | 3   | 2   |
| Total Pigments (a.u.)                              | 151                                                                                         | 25  | 7   | 3   | 2   |
| H*, Tone or Angle of HUE (0-360°)                  | 191                                                                                         | 31  | 8   | 4   | 2   |
| b*, Blue-Yellow (a.u.) [blue < 0 > yellow]         | 232                                                                                         | 38  | 10  | 5   | 3   |
| Polymeric Proanthocyanidins (mg/L)                 | 474                                                                                         | 76  | 19  | 9   | 5   |
| Total Condensed Tannins (mg/L)                     | 477                                                                                         | 77  | 20  | 9   | 5   |
| Flavanol Monomers (mg/L)                           | 883                                                                                         | 142 | 36  | 16  | 9   |
| Ionised Anthocyanins (mg/L malvidin 3-O-glucoside) | 1291                                                                                        | 207 | 52  | 23  | 13  |
| Degree of Ionisation of Anthocyanins (%)           | 1453                                                                                        | 233 | 59  | 26  | 15  |
| Oligomeric Proanthocyanidins (mg/L)                | 1599                                                                                        | 256 | 64  | 29  | 16  |
| Total Anthocyanins (mg/L malvidin 3-O-glucoside)   | 2845                                                                                        | 456 | 114 | 51  | 29  |

The percentage (2%, 5%, 15% and 20%) is a range around the true barrel lot mean of the respective chemical parameter. The average result of a barrel lot analysis is predicted to be within the respective range, if the barrel lot contains of the required number of barrels or more. Results were calculated at 95% confidence, 80% power

first for the cooperages A, B, C and D, which were based on 20, 8, 9 and 12 barrels, respectively. The required barrel numbers were averaged between the cooperages and rounded up only.

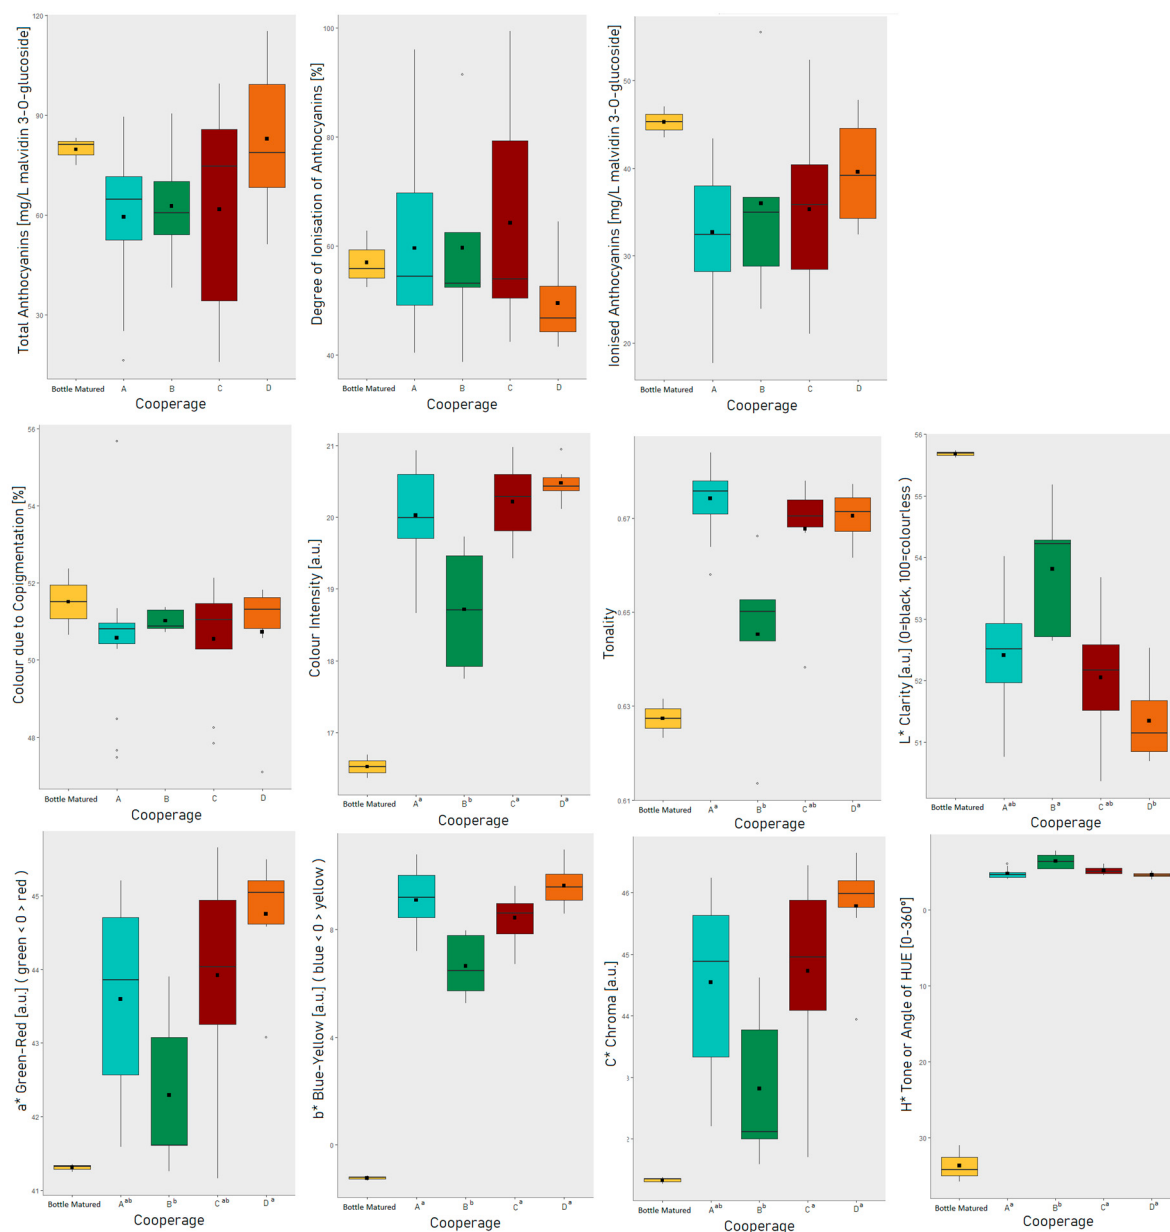

Figure S1: color, pigments of red wines after 12 months of aging in oak barrels displayed in boxplots for cooperage A, B, C, and D, as well as the bottle matured wine

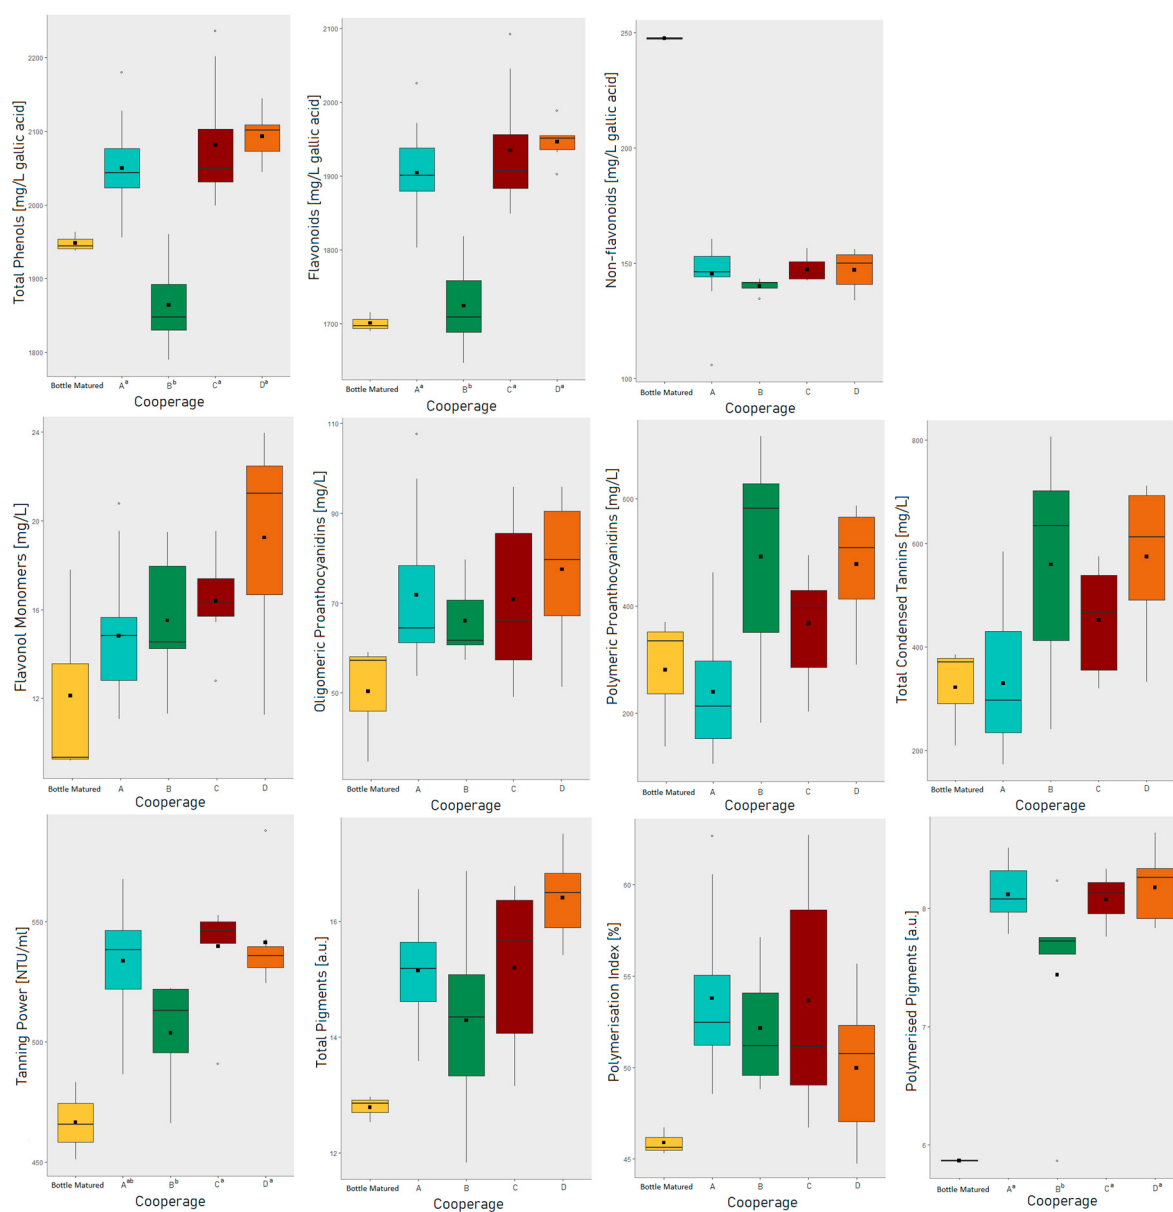

Figure S2: phenolic composition of red wines after 12 months of aging in oak barrels displayed in boxplots for cooperage A, B, C, and D, as well as the bottle matured wine.
